# Supplementary material
Source: Frontiers journal article supplement (https://www.frontiersin.org/articles/396514)
Supplement: Data_Sheet_1.PDF [file Data_Sheet_1.PDF]

### **Quality assessment of included studies using the Newcastle–Ottawa Quality Assessment Scale (NOS)**

The point score system evaluated the categories of study participant selection, comparability of the results, and quality of the outcomes. The following characteristics were assessed: a) representativeness of the exposed cohort; b) selection of the non-exposed cohort; c) ascertainment of exposure; d) demonstration that outcome of interest was not present at the start of study; e) comparability of cohorts based on study design or analysis; f) assessment of outcomes; g) follow-up periods that were sufficiently long for outcomes to occur; and h) adequacy of follow-up of cohorts. This scale varied from zero to nine stars, which indicated that studies were graded as poor quality if the score was <5, fair if the score was 5 to 7, and good if the score was >8. Studies with a score equal to or higher than six were included.

| Studies        | Selection                    |                             |                       |                        | Comparability | Exposure                  |                                           |                   | Total score (0-9) |
|----------------|------------------------------|-----------------------------|-----------------------|------------------------|---------------|---------------------------|-------------------------------------------|-------------------|-------------------|
|                | Adequate definition of cases | Representativeness of cases | Selection of controls | Definition of controls |               | Ascertainment of exposure | Same method of ascertainment for subjects | Non-response rate |                   |
| Couderc 2010   | *                            | *                           | *                     | *                      | 0             | *                         | *                                         | *                 | 7                 |
| Darbar 2008    | *                            | *                           | *                     | *                      | * (age)       | *                         | *                                         | *                 | 8                 |
| Topilski 2007  | *                            | *                           | *                     | *                      | * (age)       | *                         | *                                         | *                 | 8                 |
| Yamaguchi 2003 | *                            | *                           | *                     | *                      | 0             | *                         | *                                         | *                 | 7                 |

**Supplementary Table 1.** NOS risk of bias scale for case-control studies.

| Studies      | Selection                                           |                                                  |                                   |                                                                     | Comparability | Outcome                  |                                                |                                                     | Total score<br>(0-9) |
|--------------|-----------------------------------------------------|--------------------------------------------------|-----------------------------------|---------------------------------------------------------------------|---------------|--------------------------|------------------------------------------------|-----------------------------------------------------|----------------------|
|              | Representativ-<br>eness of the<br>exposed<br>Cohort | Selection<br>of the<br>non-<br>exposed<br>cohort | Ascertain-<br>ment of<br>exposure | Outcome<br>of<br>interest<br>not<br>present at<br>start of<br>study |               | Assessment<br>of outcome | Adequacy<br>of<br>duration<br>of follow-<br>up | Adequacy<br>of<br>complete-<br>ness of<br>follow-up |                      |
| Subbiah 2010 | *                                                   | *                                                | *                                 | *                                                                   | * (age)       | *                        | *                                              | *                                                   | 8                    |

**Supplementary Table 2.** NOS risk of bias scale cohort studies.

## Bias analysis

Regarding  $T_{\text{peak}} - T_{\text{end}}$  intervals, The Cochran's Q value was greater than the degrees of freedom (6 vs. 4), indicating that the true effect size was different between studies.  $I^2$  took a value of 34%, suggesting a low level of heterogeneity. A funnel plot plotting standard errors against differences in means is shown in **Supplementary Figure 1**. Begg and Mazumdar rank correlation analysis demonstrated that Kendall's Tau took a value of 0.2 with  $P = 0.62$ , which suggests no significant publication bias. Egger's test demonstrated no significant asymmetry (intercept 1.5, t-value 1.2;  $P = 0.32$ ). To identify the source of the heterogeneity, sensitivity analysis was performed by removing one study at a time. However, this did not significantly influence the mean difference (**Supplementary Figure 2**), suggesting that no single study was responsible for the heterogeneity observed in this meta-analysis.

For  $T_{\text{peak}} - T_{\text{end}} / QT$  ratio, The Cochran's Q value was less than the degrees of freedom (0.2 vs. 3), indicating that the true effect size was not significantly different between the included studies.  $I^2$  took a value of 0%, suggesting no heterogeneity. A funnel plot plotting standard errors against differences in means is shown in **Supplementary Figure 3**. Begg and Mazumdar rank correlation analysis demonstrated that Kendall's Tau took a value of 0 with  $P = 1.00$ , which suggests no publication bias. Egger's test demonstrated no significant asymmetry (intercept 0.1, t-value 0.3;  $P = 0.81$ ). To identify the source of the heterogeneity, sensitivity analysis was performed by removing one study at a time to calculate the pooled OR. However, this did not significantly influence the mean difference (**Supplementary Figure 4**), suggesting that no single study was responsible for the heterogeneity observed in this meta-analysis.

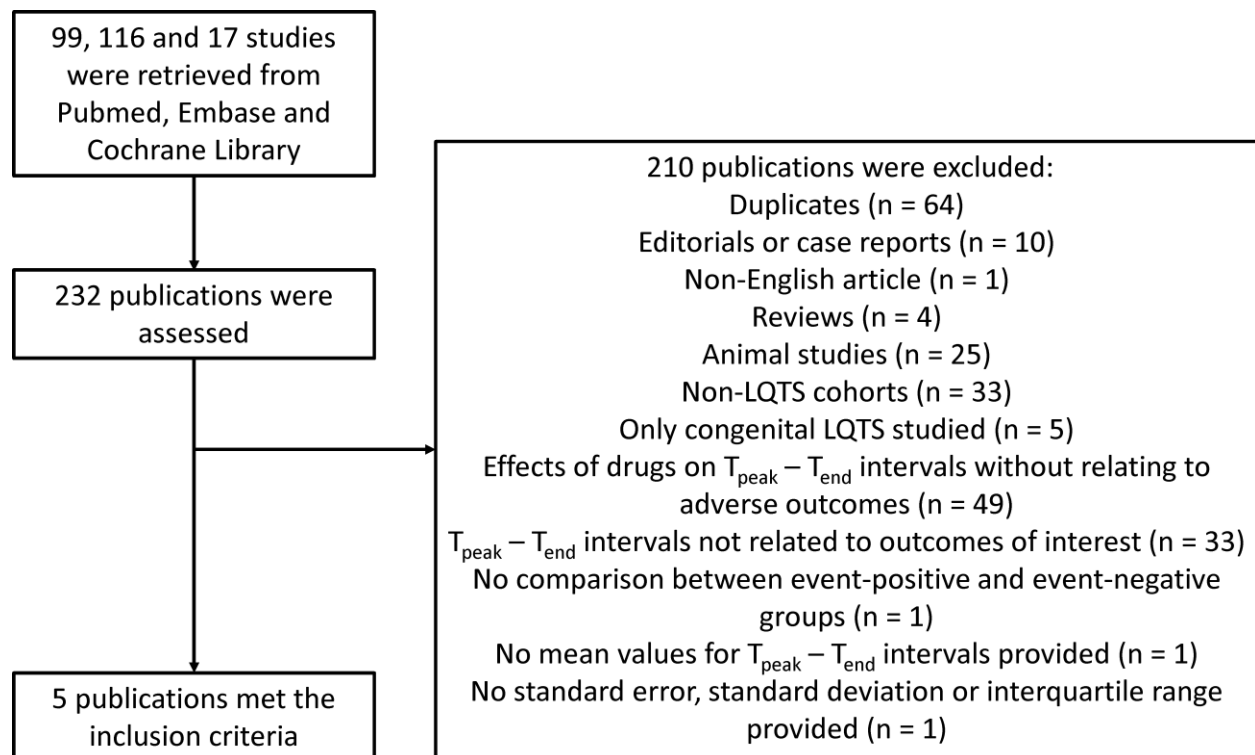

**Supplementary Figure 1.** Flow diagram of the study selection process.

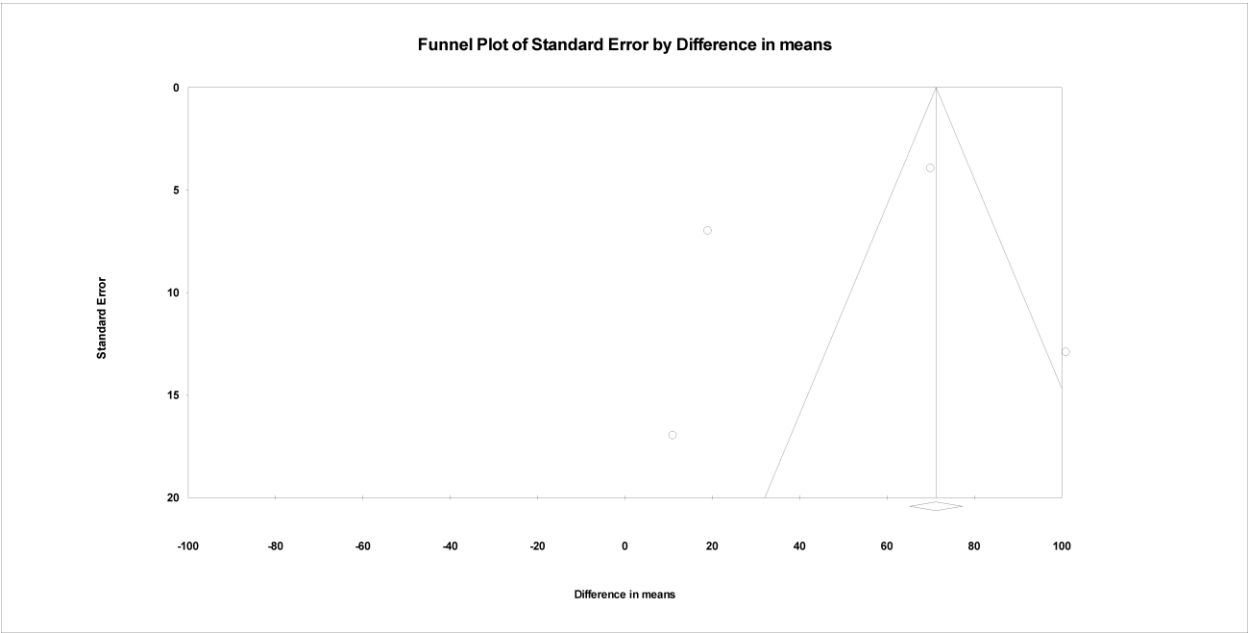

**Supplementary Figure 2.** Funnel plot of standard errors against differences in means for  $T_{\text{peak}} - T_{\text{end}}$  interval.

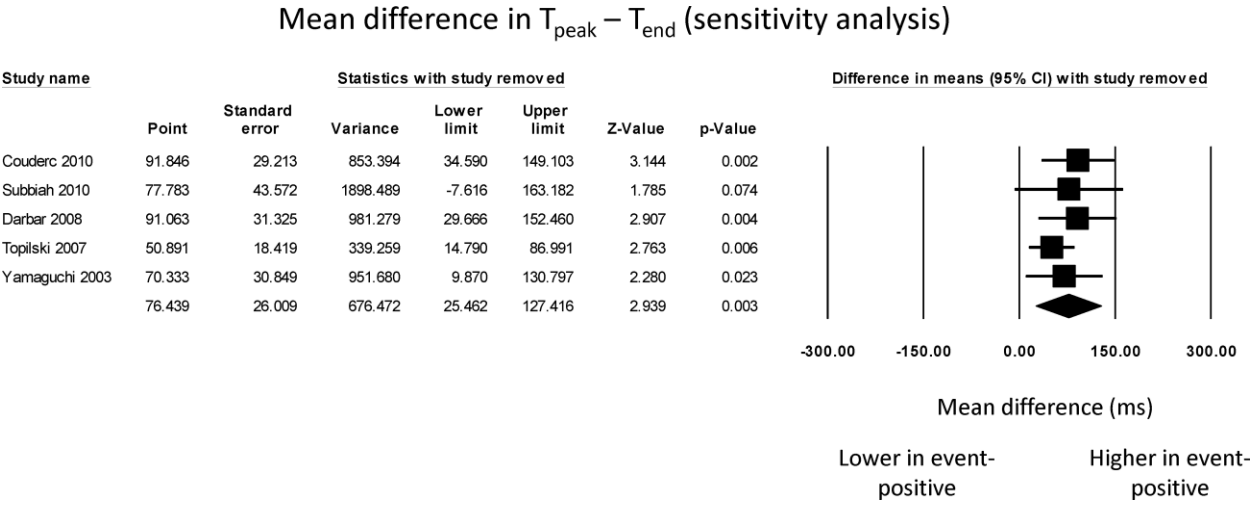

**Supplementary Figure 3.** Forest plot demonstrating the results of sensitivity analysis by removing one study at a time for mean differences of  $T_{\text{peak}} - T_{\text{end}}$  intervals.

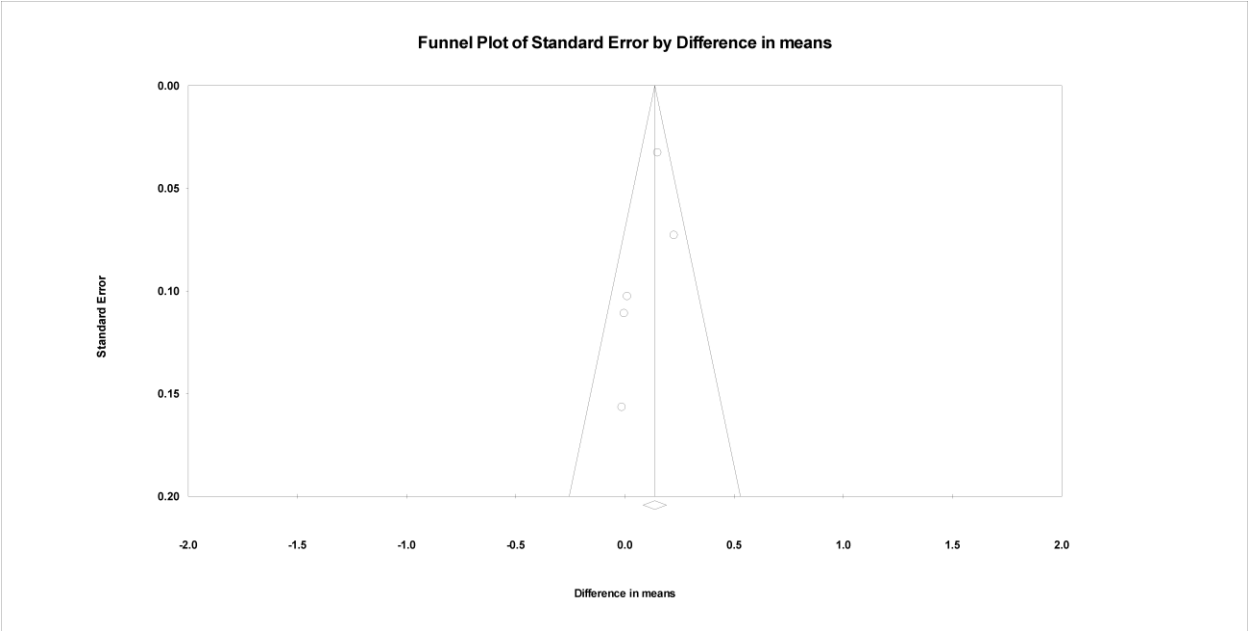

**Supplementary Figure 4.** Funnel plot of standard errors against differences in means for  $T_{\text{peak}} - T_{\text{end}} / \text{QT}$  ratio.

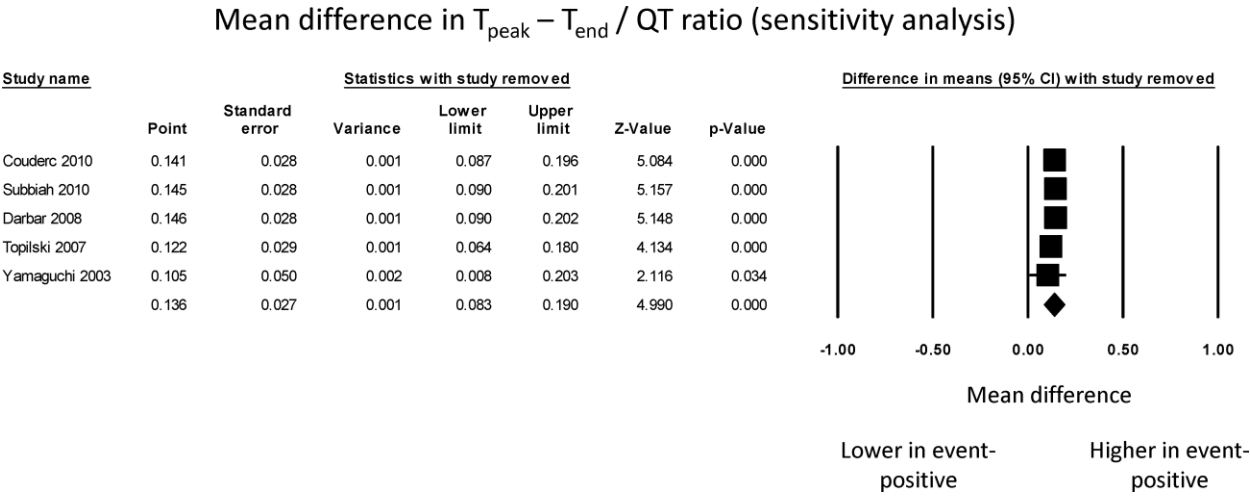

**Supplementary Figure 5.** Forest plot demonstrating the results of sensitivity analysis by removing one study at a time for mean differences of  $T_{\text{peak}} - T_{\text{end}} / \text{QT}$  ratio.
